# Supplementary material for: Integrated analysis reveals FOXA1 and Ku70/Ku80 as targets of ivermectin in prostate cancer
Source: PubMed Central journal article supplement (PMC9436997; doi:10.1038/s41419-022-05182-0), 2022-09-01

Fig. 2C LNCaP

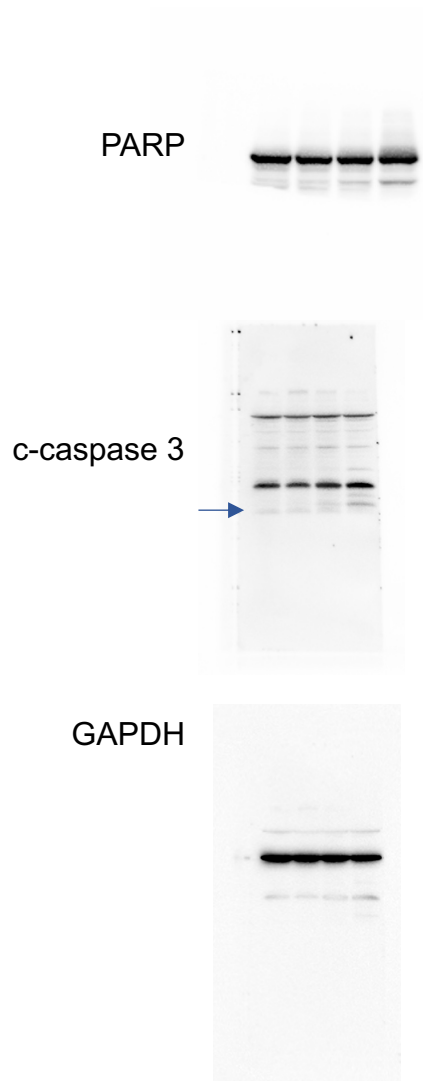

Fig. 2C C4-2

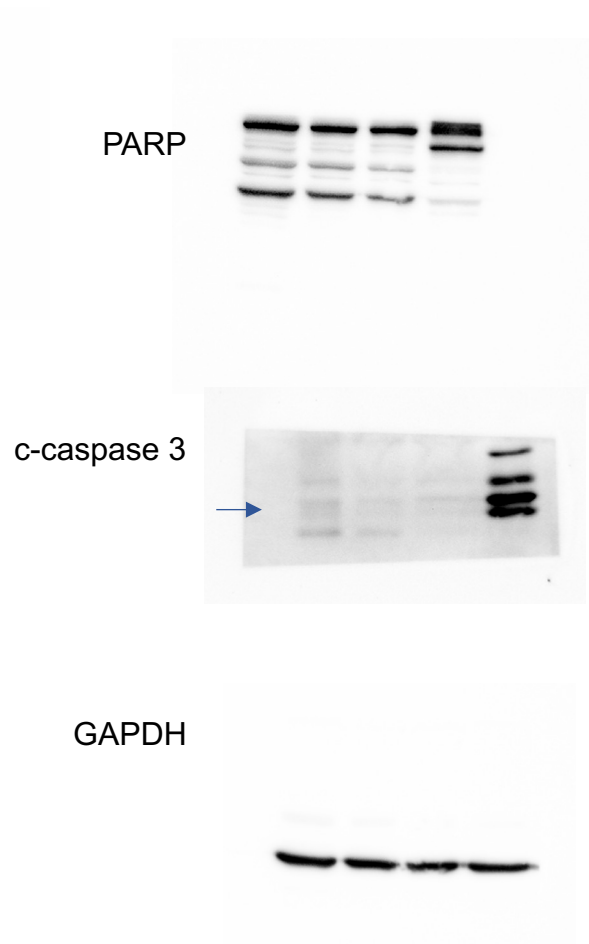

Fig. 2C 22RV1

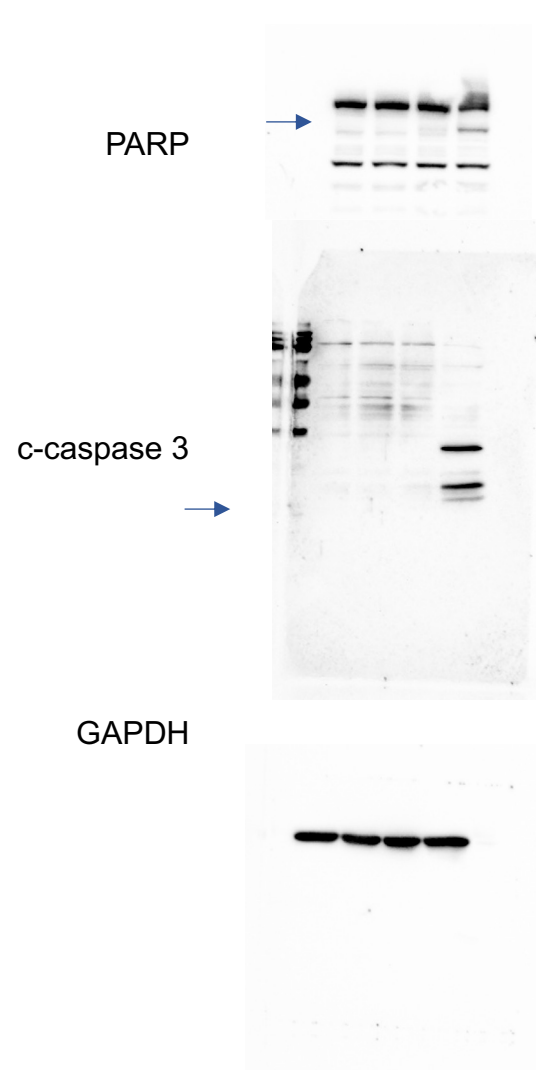

Fig. 2E LNCaP

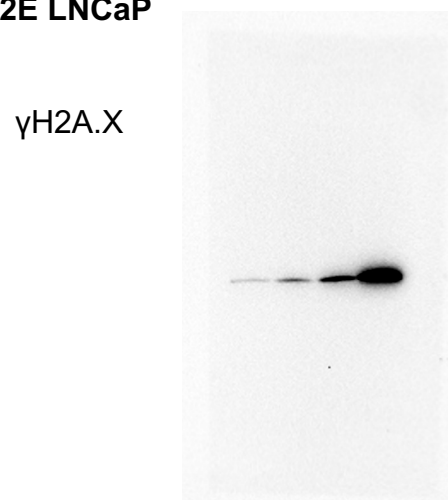

Fig. 2E C4-2

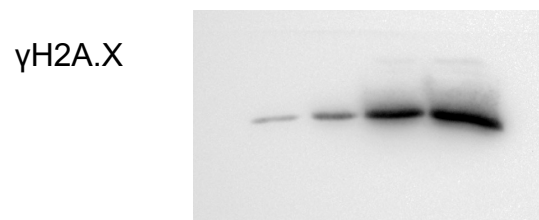

Fig. 2E 22RV1

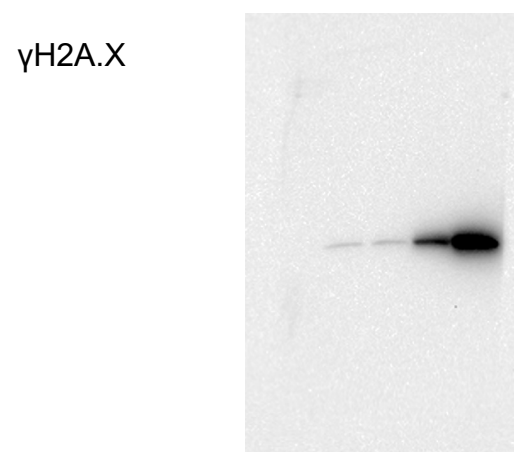

GAPDH

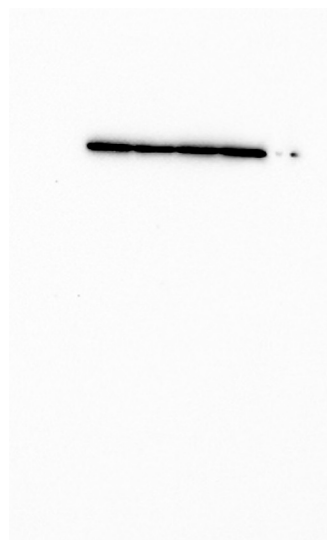

GAPDH

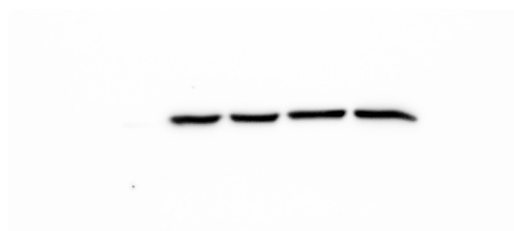

GAPDH

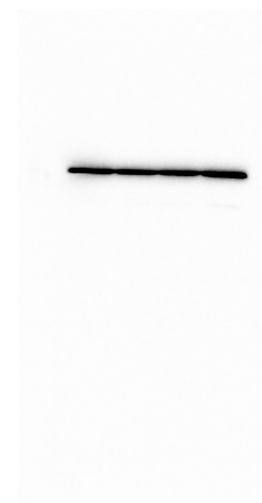

**Fig. 3A LNCaP**

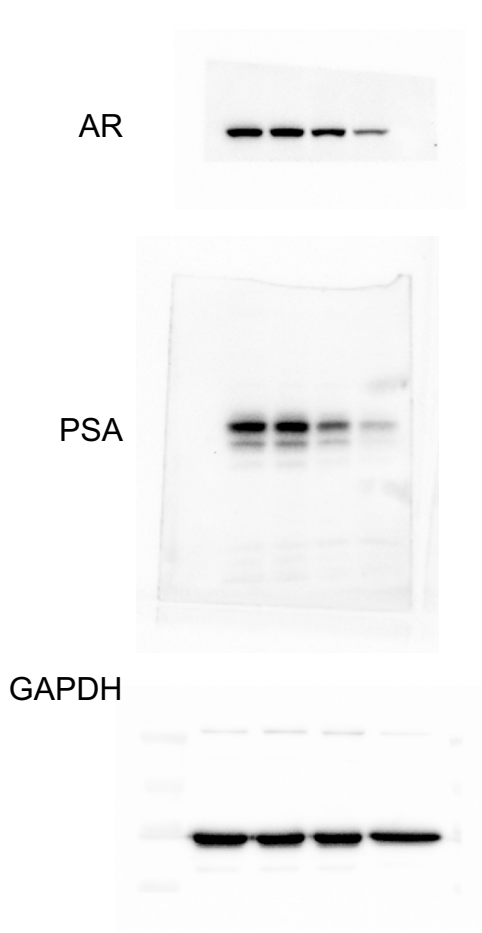

**Fig. 3A C4-2**

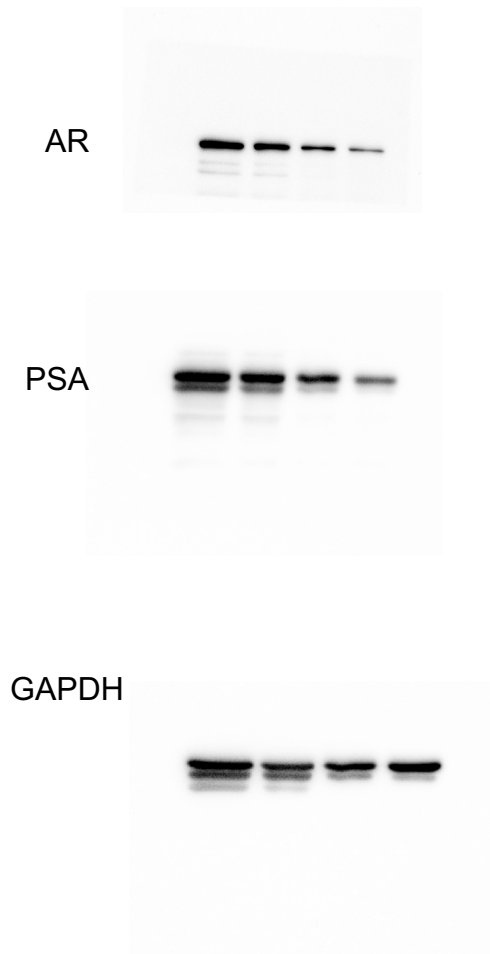

**Fig. 3F LNCaP**

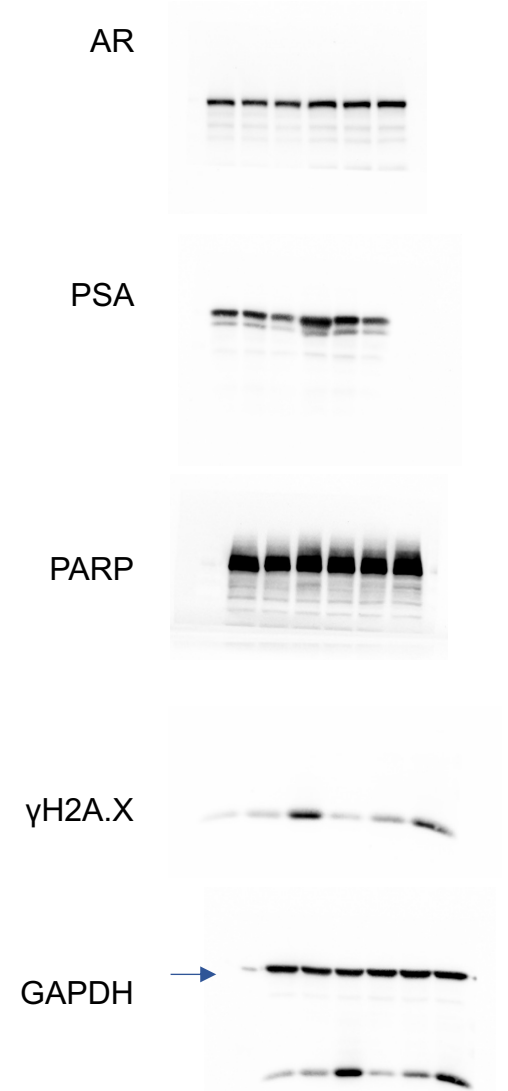

**Fig. 3E LN95**

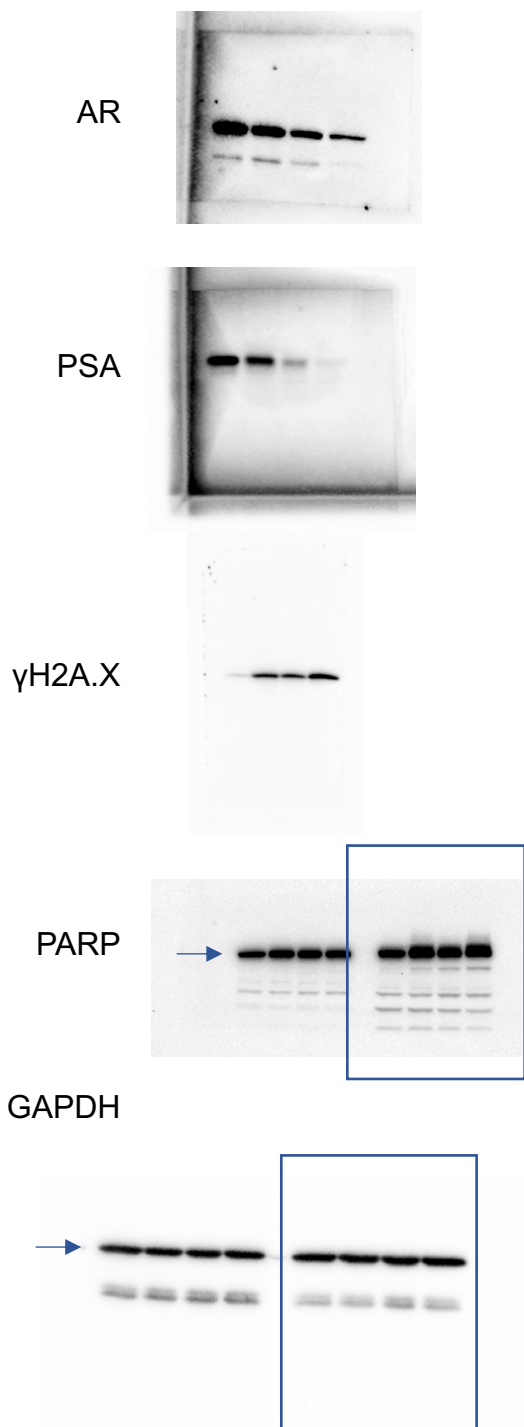

**Fig. 3E VCaP**

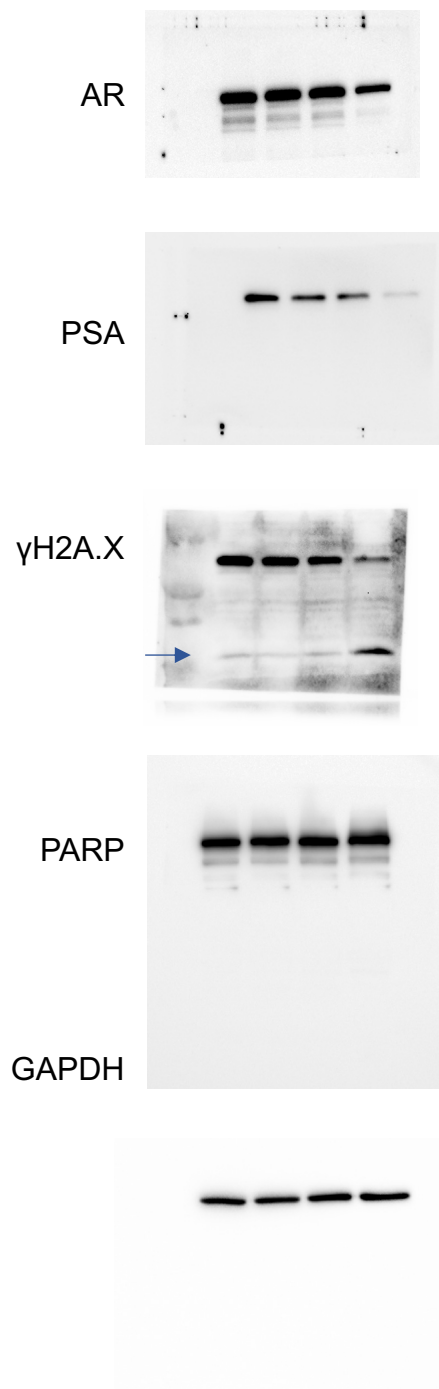

**Fig. 3F C4-2**

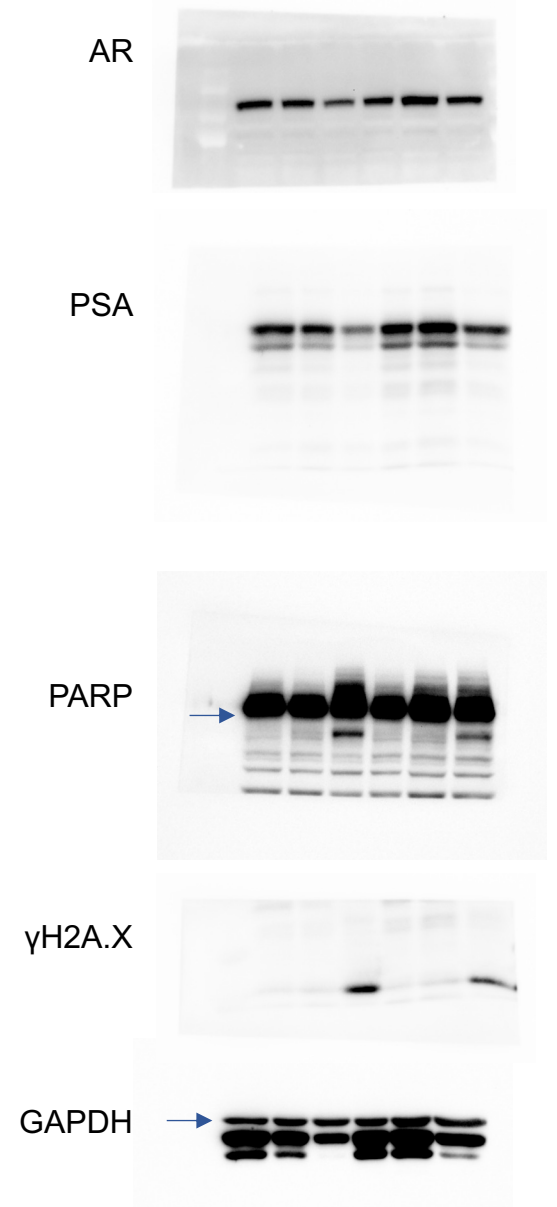

Fig. 4E C4-2

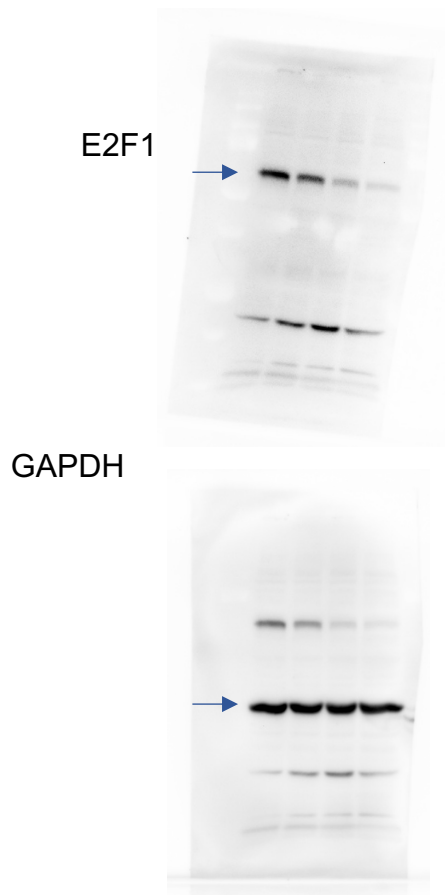

Fig. 4E 22RV1

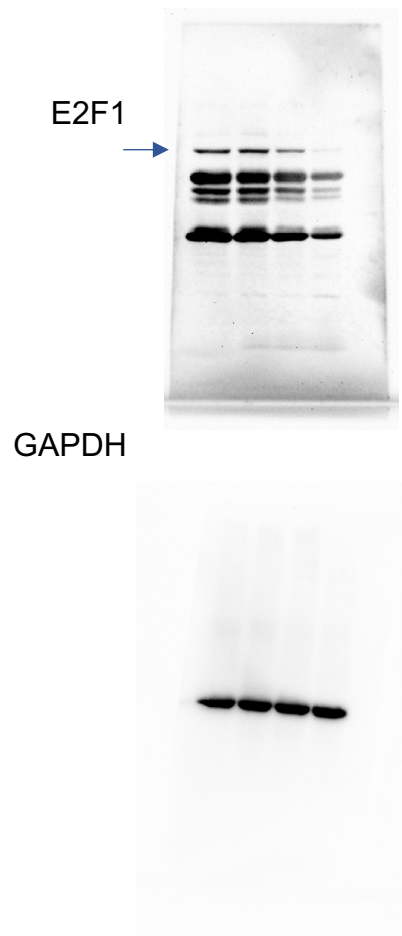

Fig. 4G C4-2

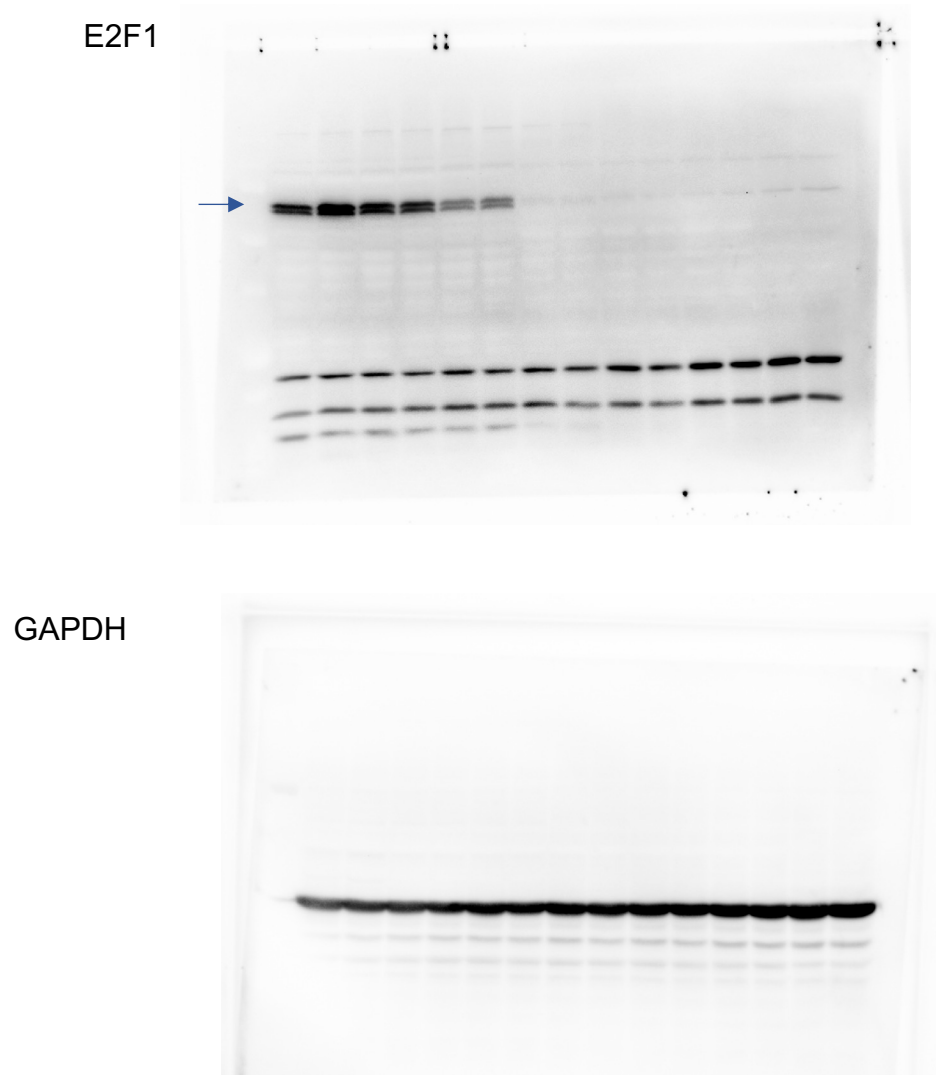

**Fig. 5C LNCaP**

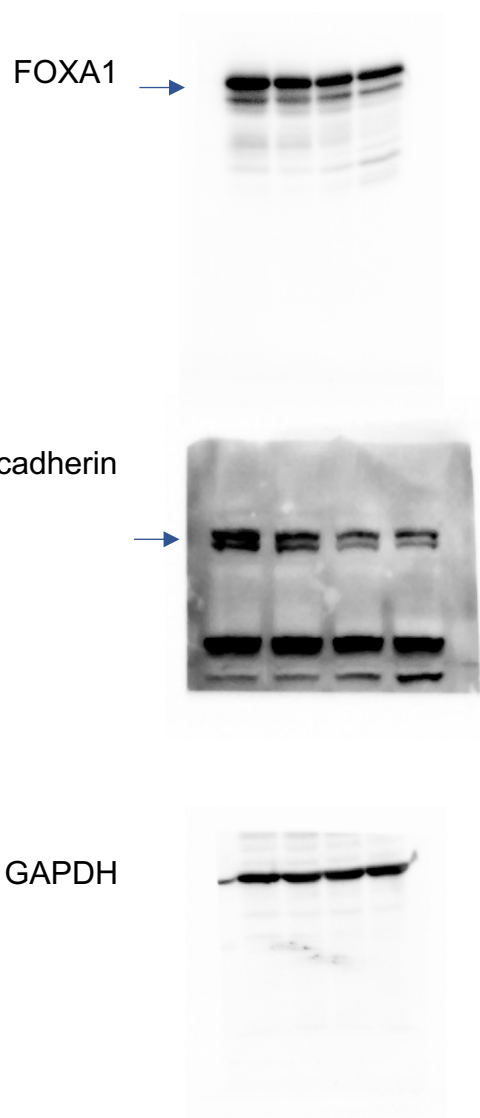

**Fig. 5C C4-2**

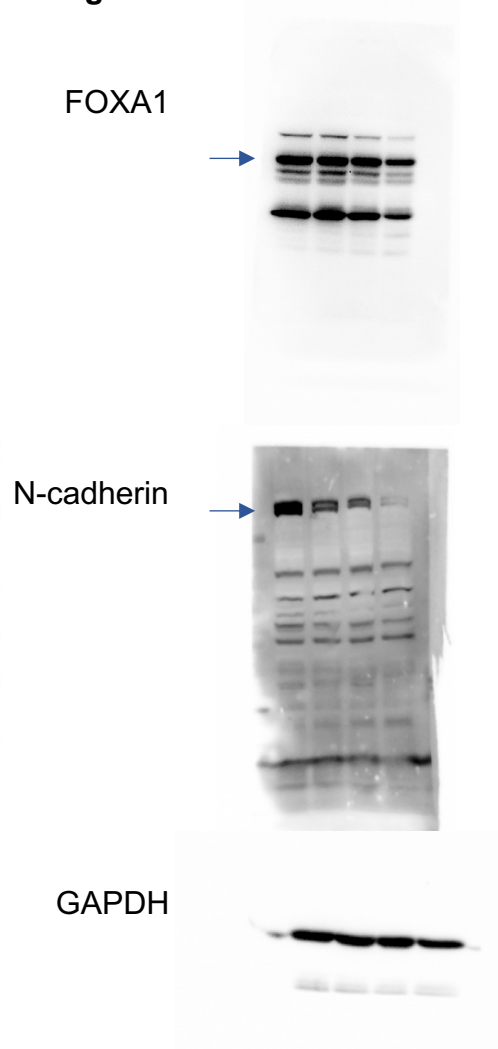

**Fig. 5G LNCaP**

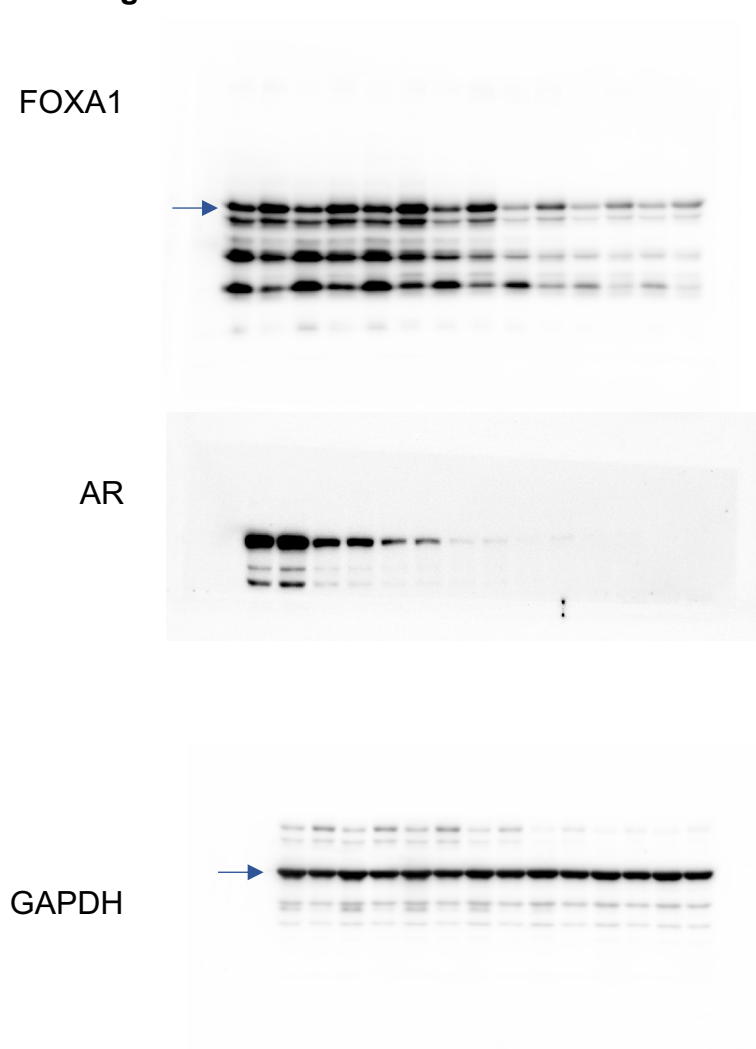

**Fig. 5H C4-2**

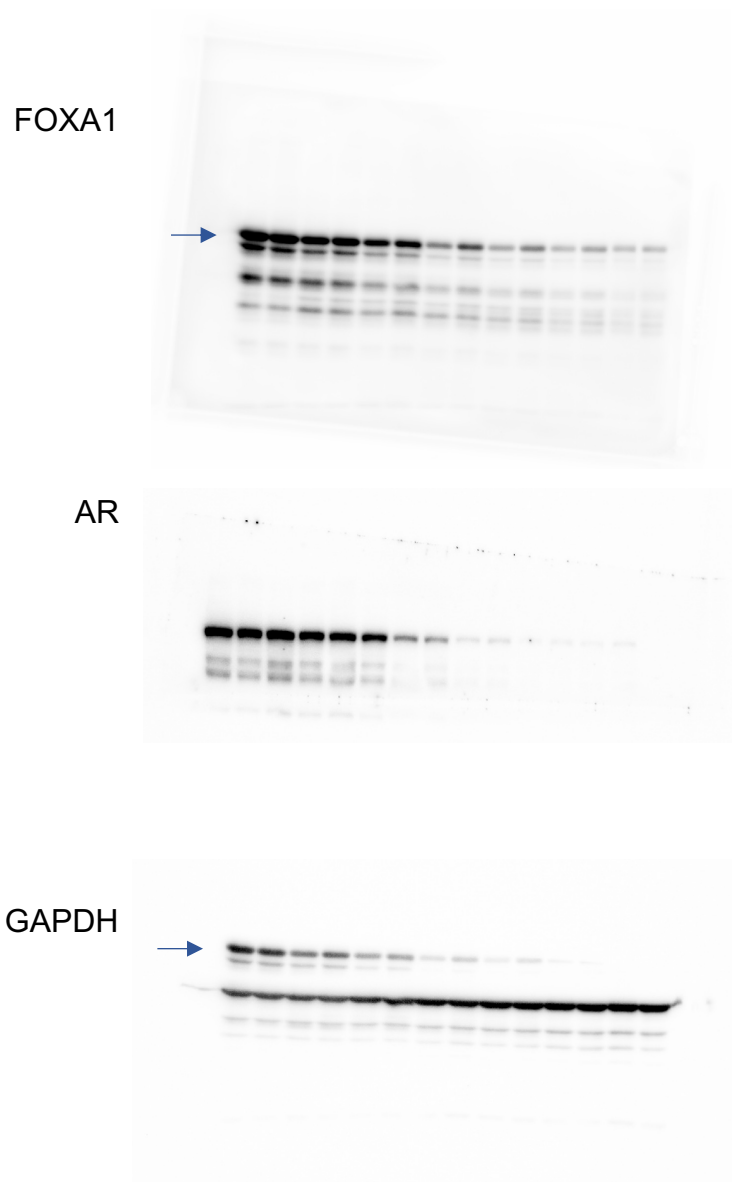

**Fig. 5I 22RV1**

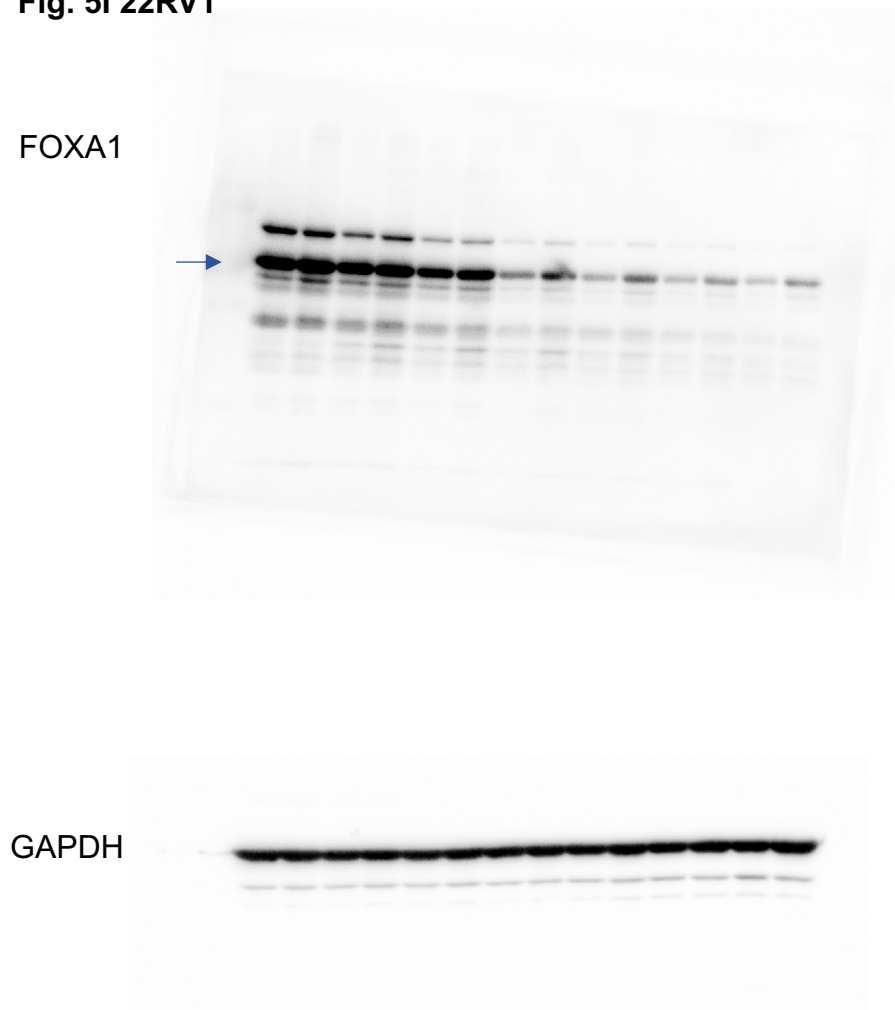

Fig. 6D LNCaP

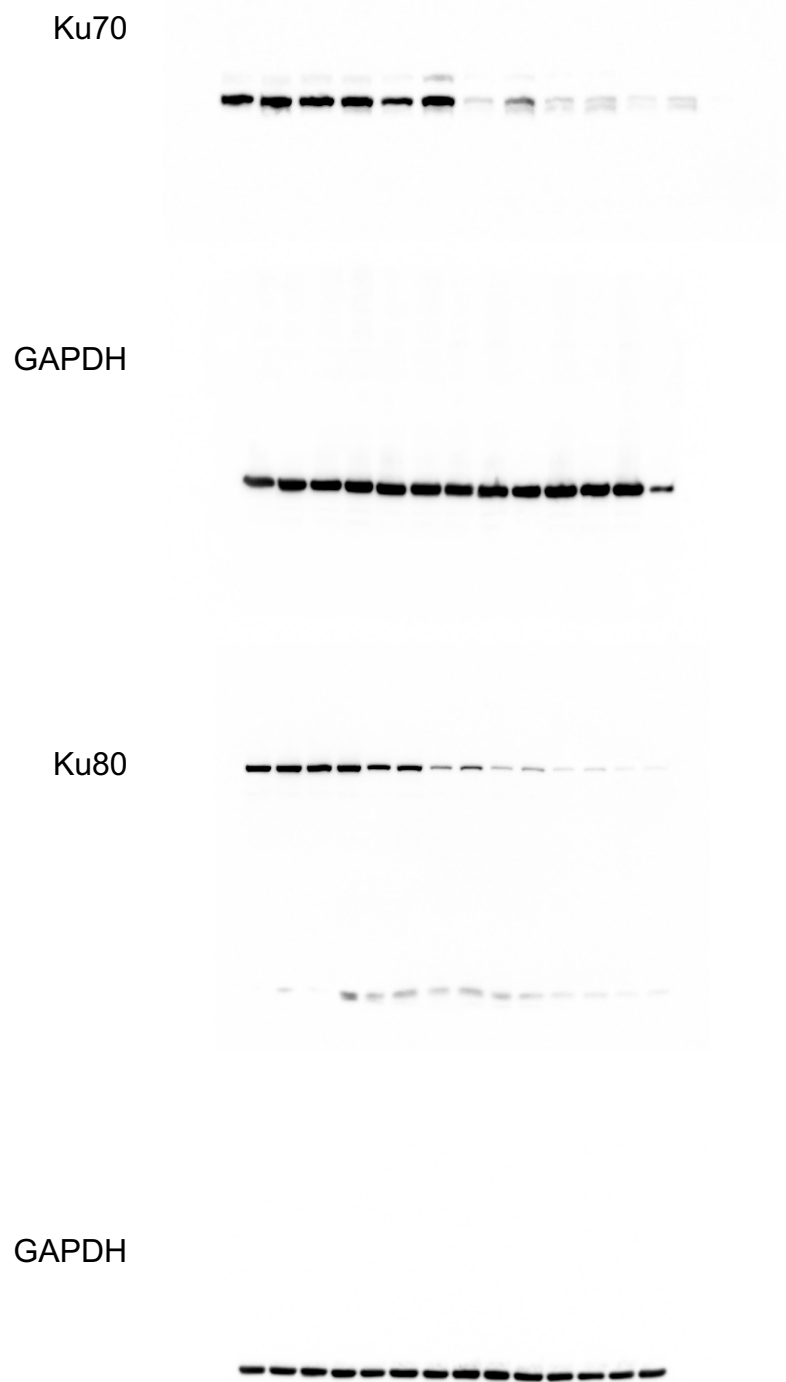

Fig. 6E C4-2

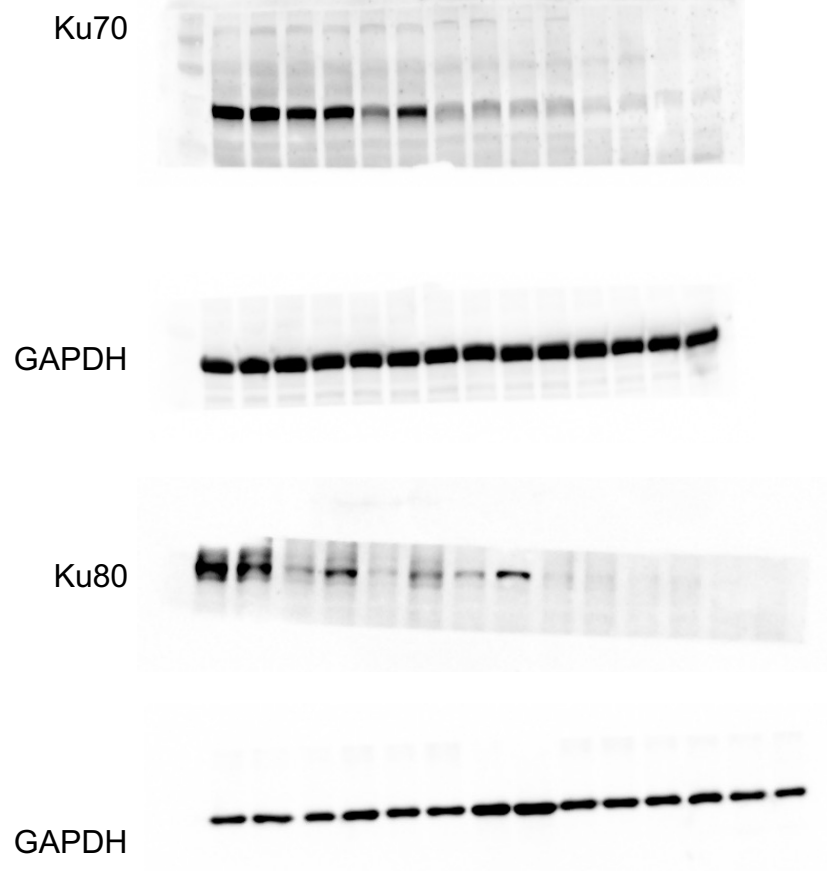

Fig. 7B C4-2

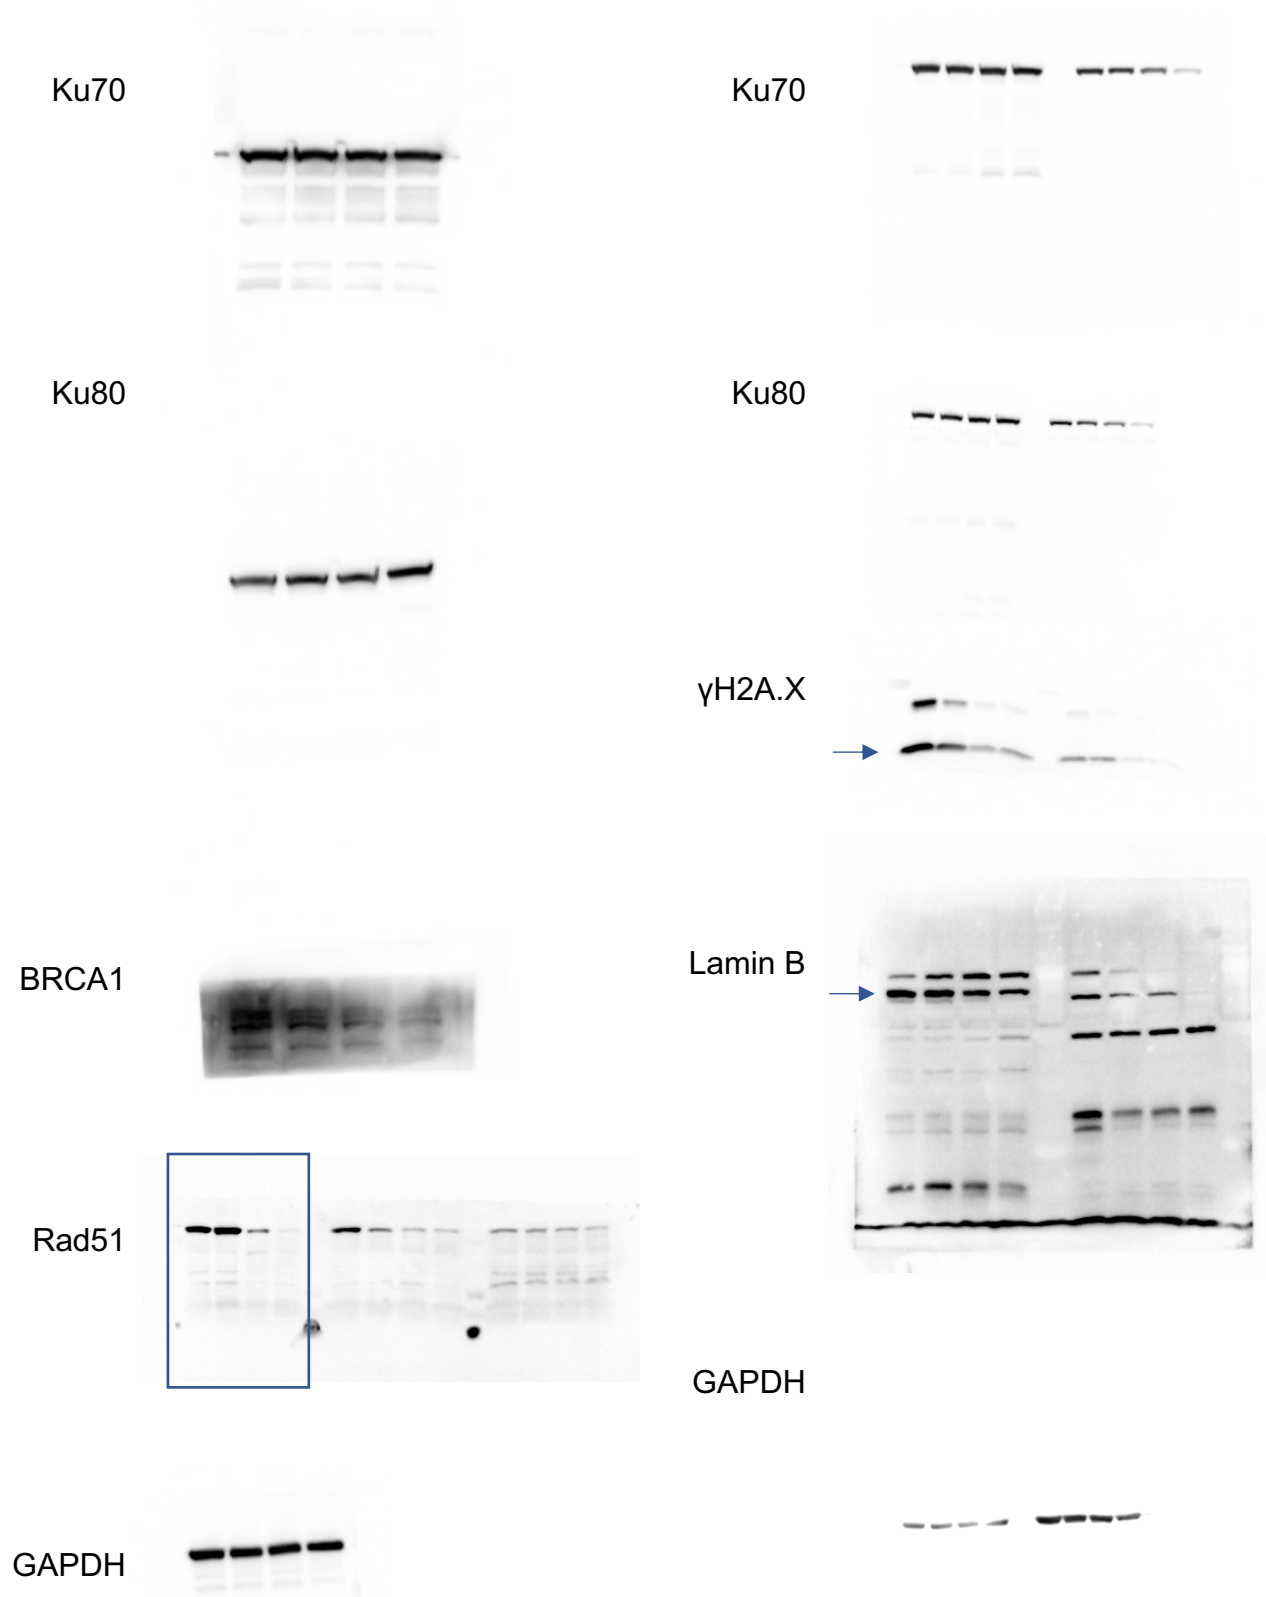



Fig. 7C 22RV1

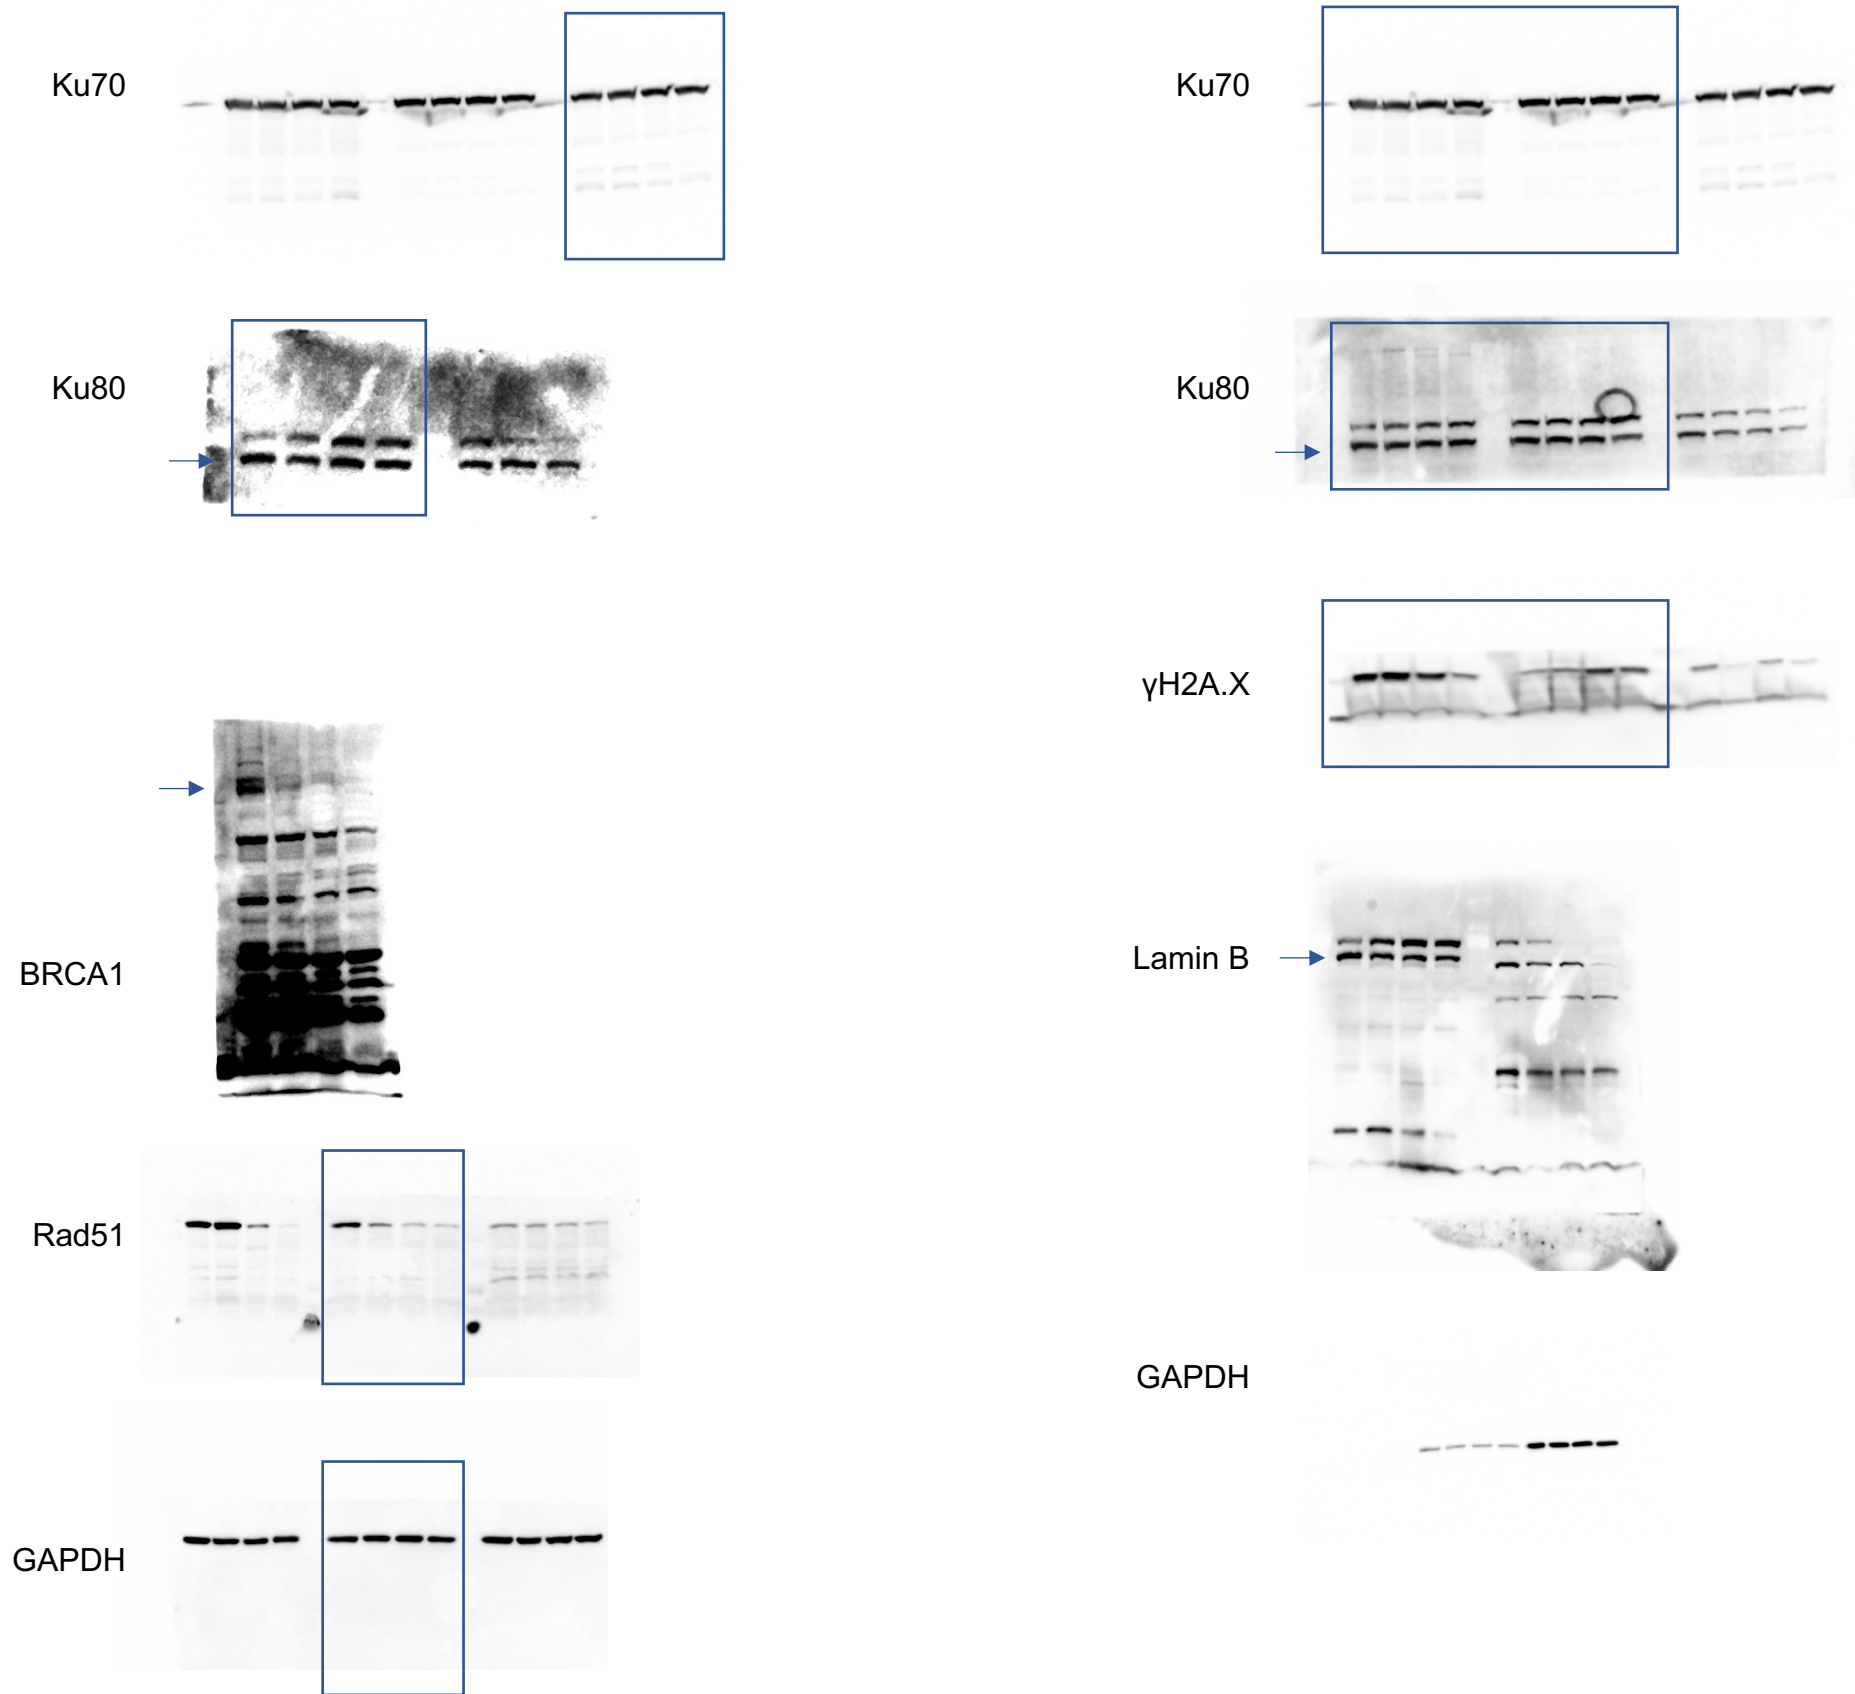

**Fig. S3B DU145**

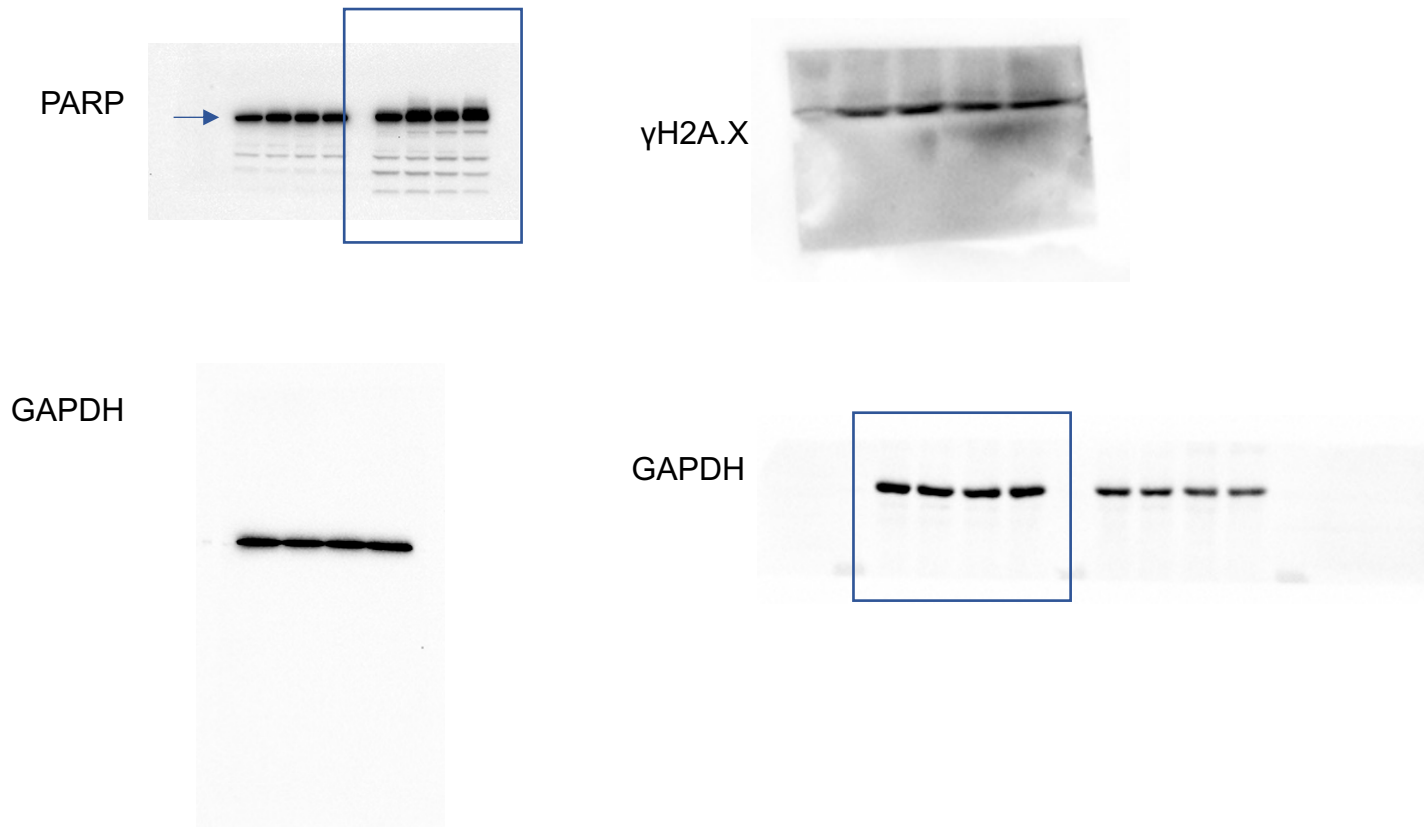

**Fig. S3E PC-3**

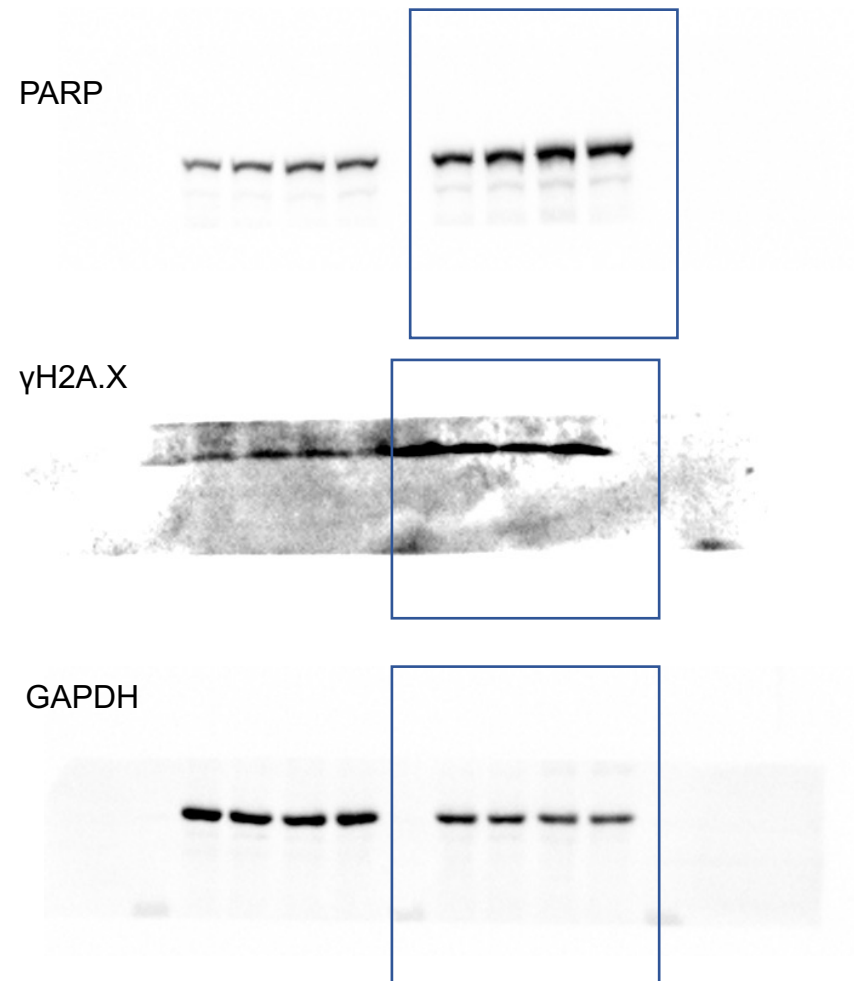

**Fig. S3F 22RV1 xenograft model**

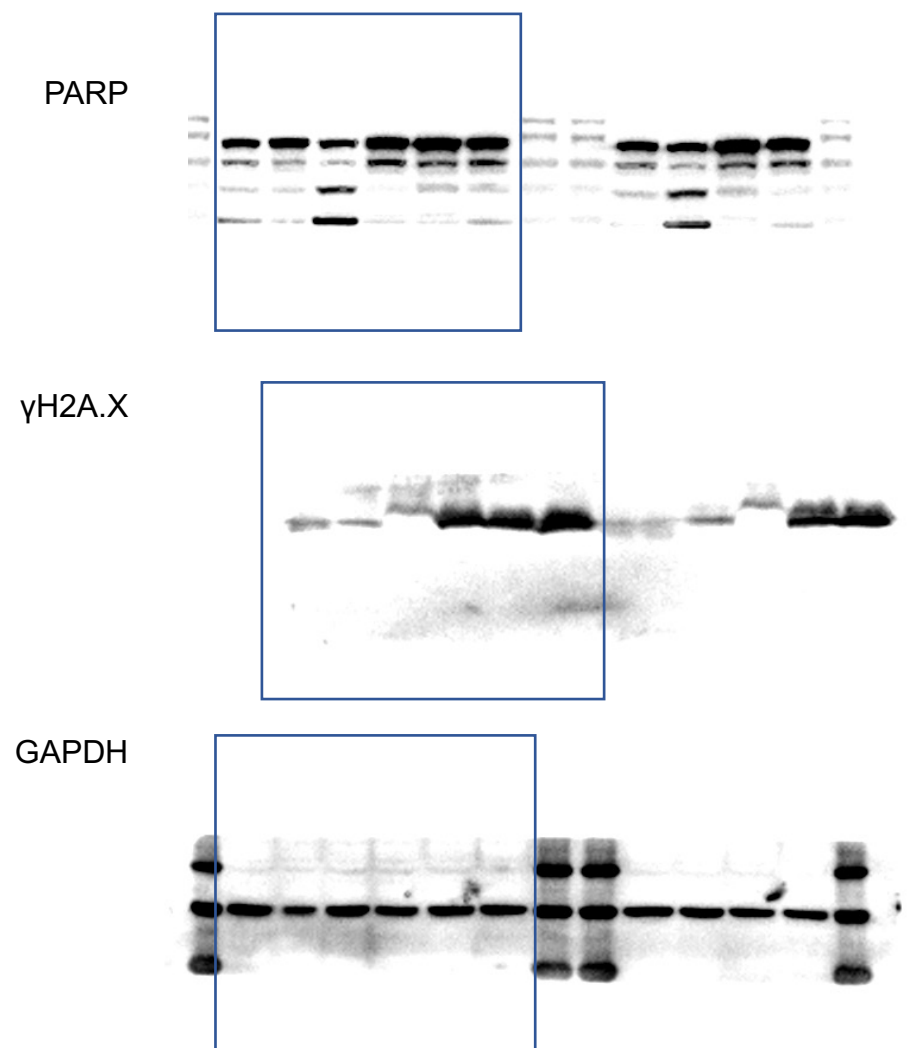



**Fig. S6D C4-2**

FOXA1

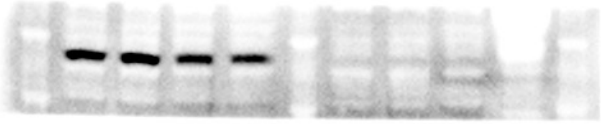

PARP

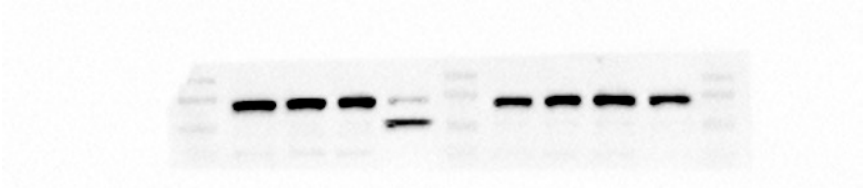

$\gamma$ H2A.X

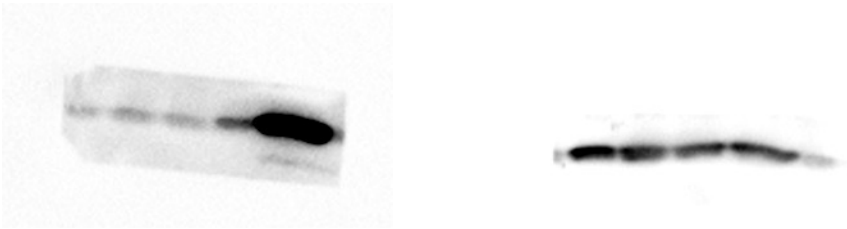

GAPDH

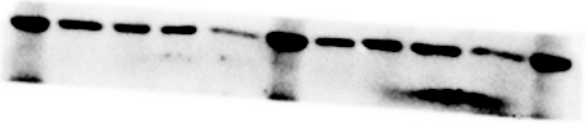

**Fig. S6E LNCaP**

FOXA1

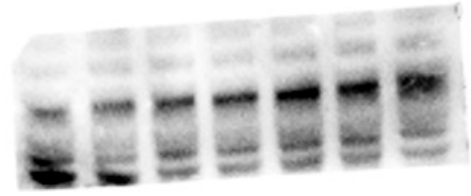

GAPDH

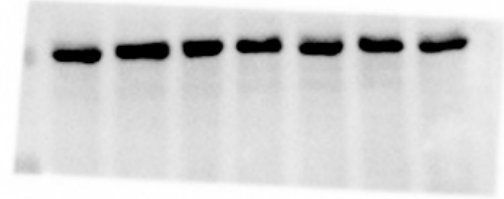

**Fig. S6E 22RV1**

FOXA1

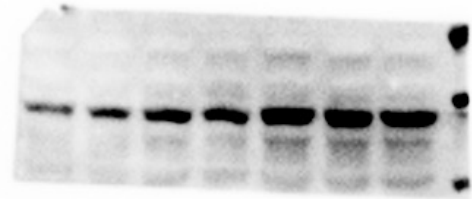

GAPDH

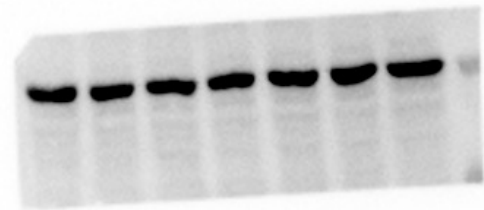

Fig. S7A 22RV1

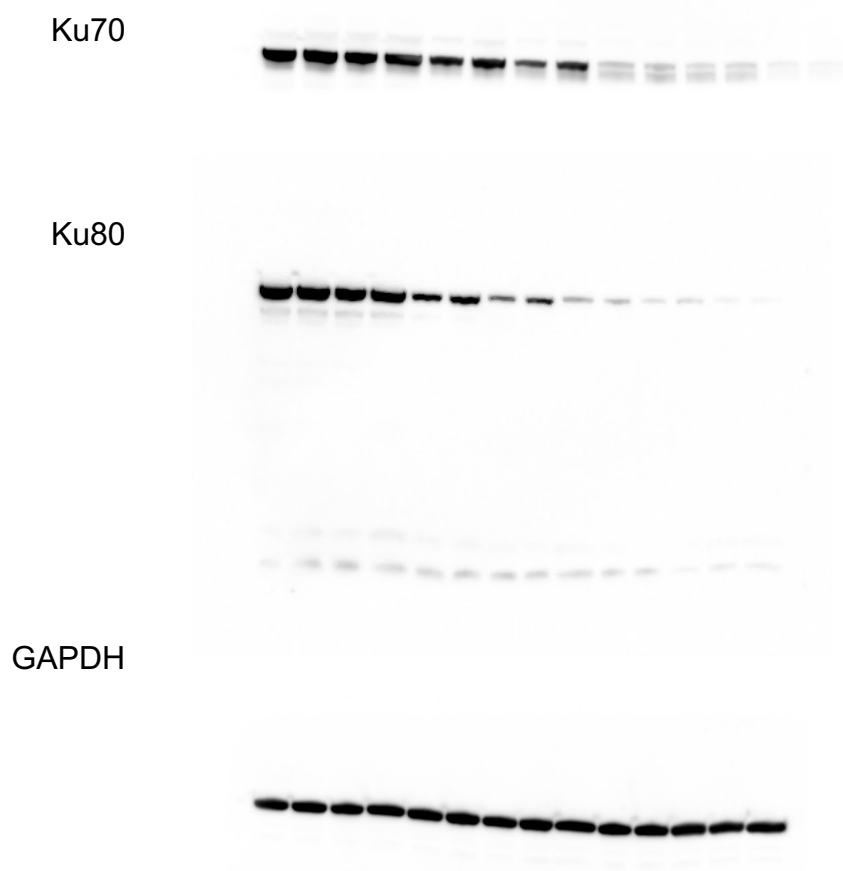

Fig. S7B LNCaP

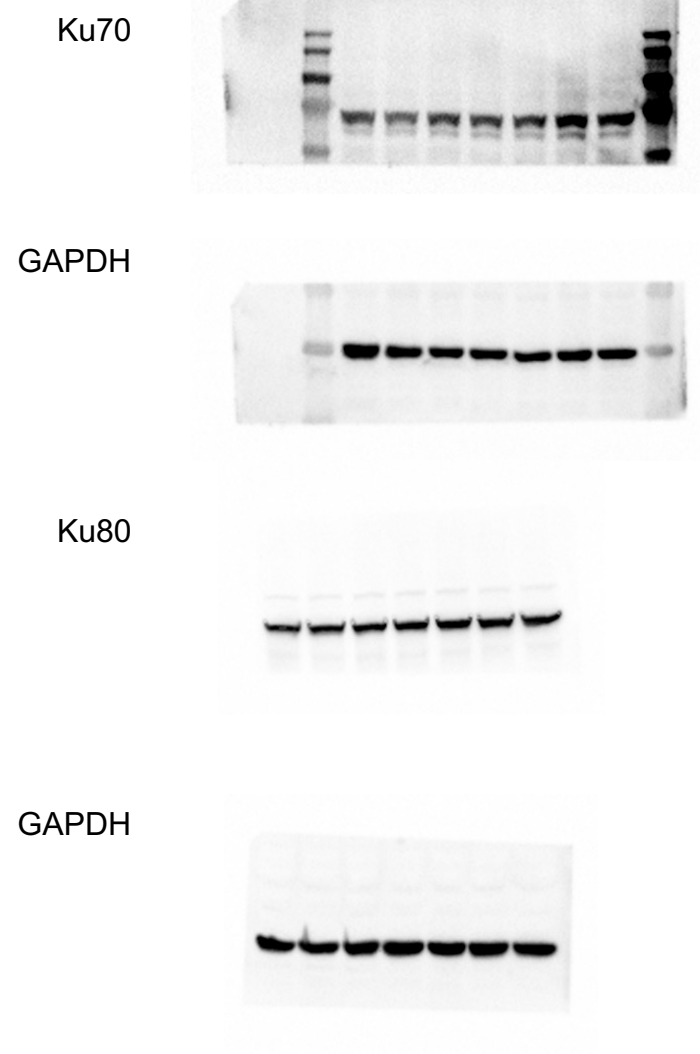

Fig. S7C 22RV1

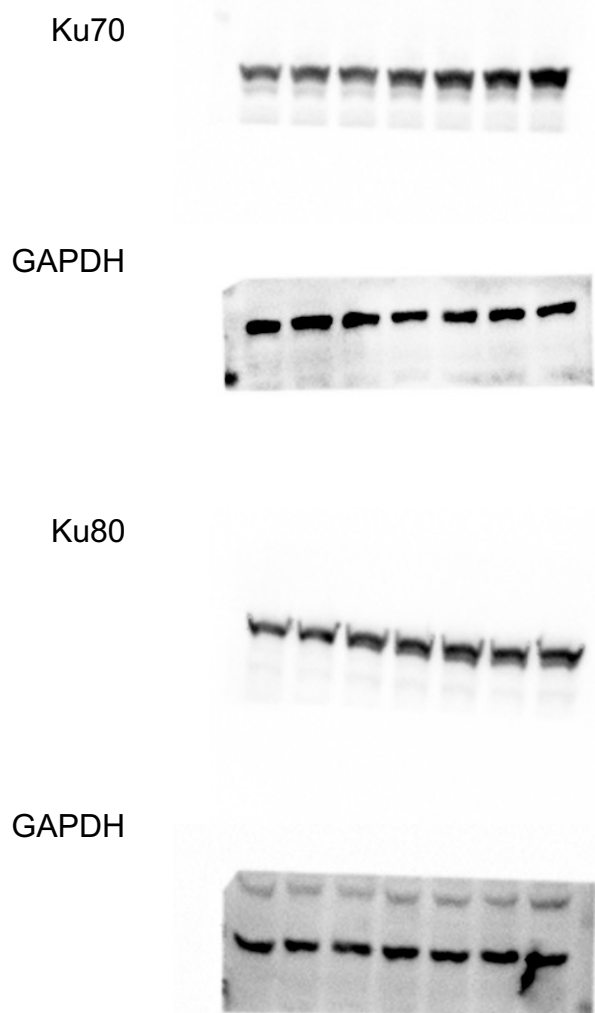

**Fig. S8B C4-2**

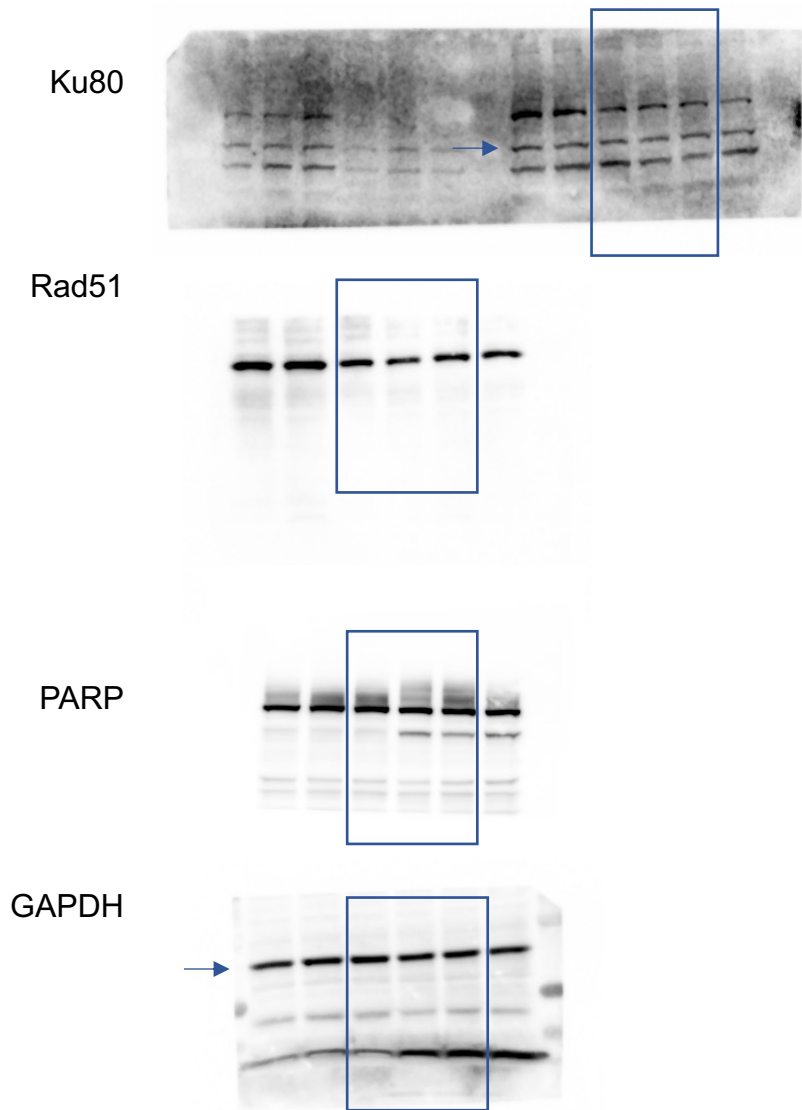

**Fig. S8C C4-2**

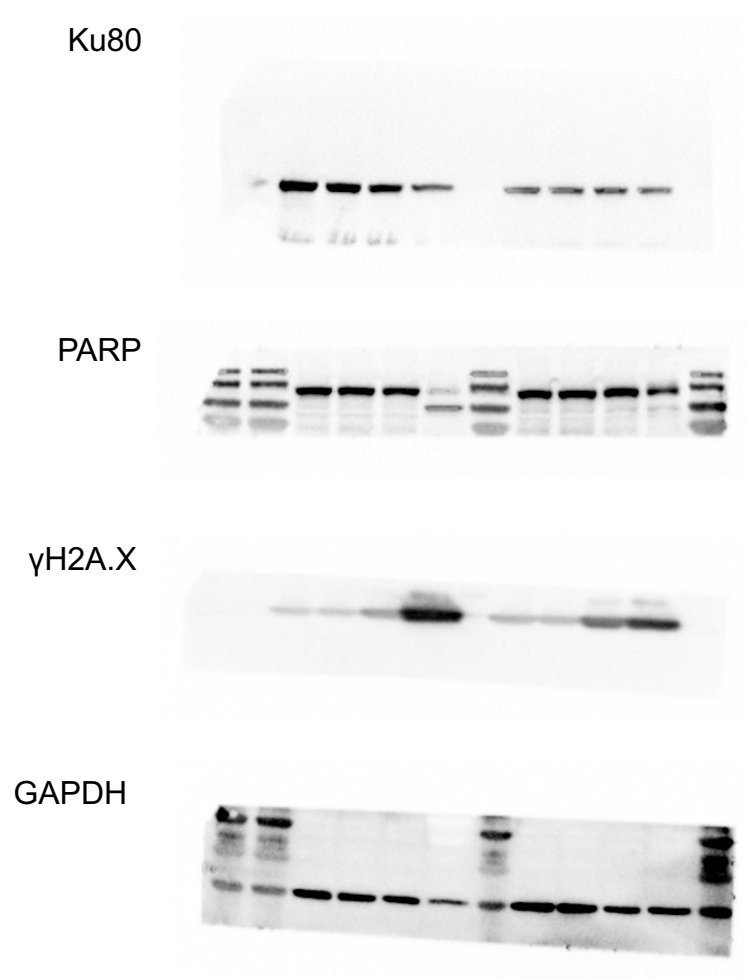

**Fig. S8D DU145**

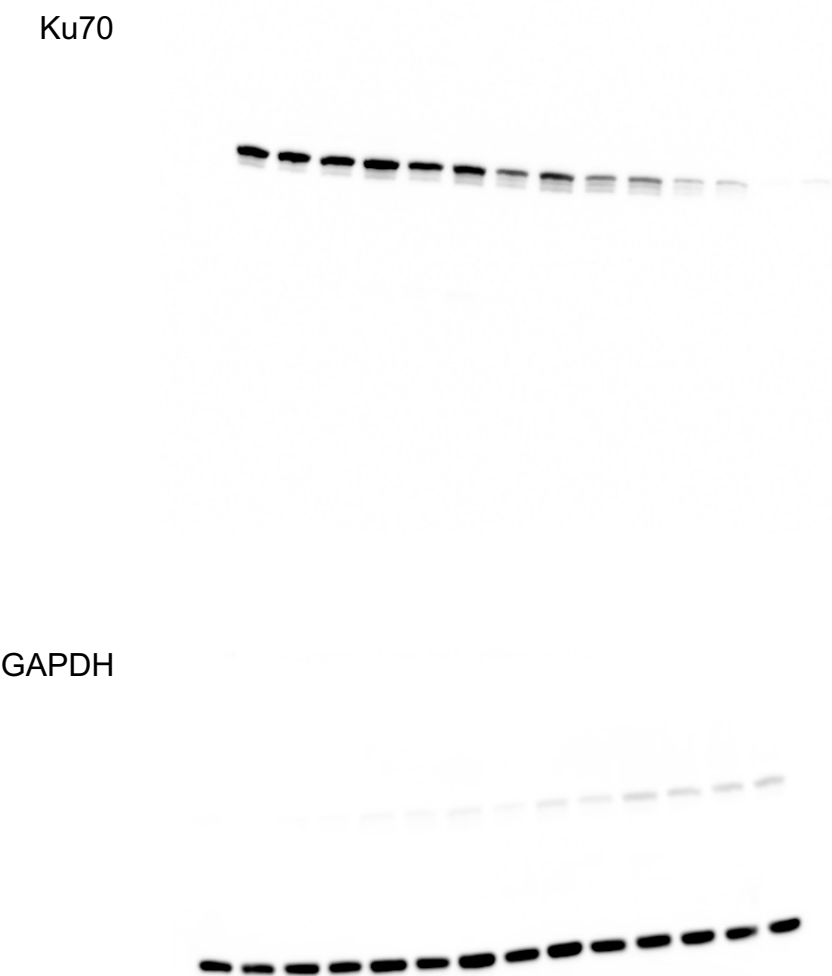

Fig. S8E DU145

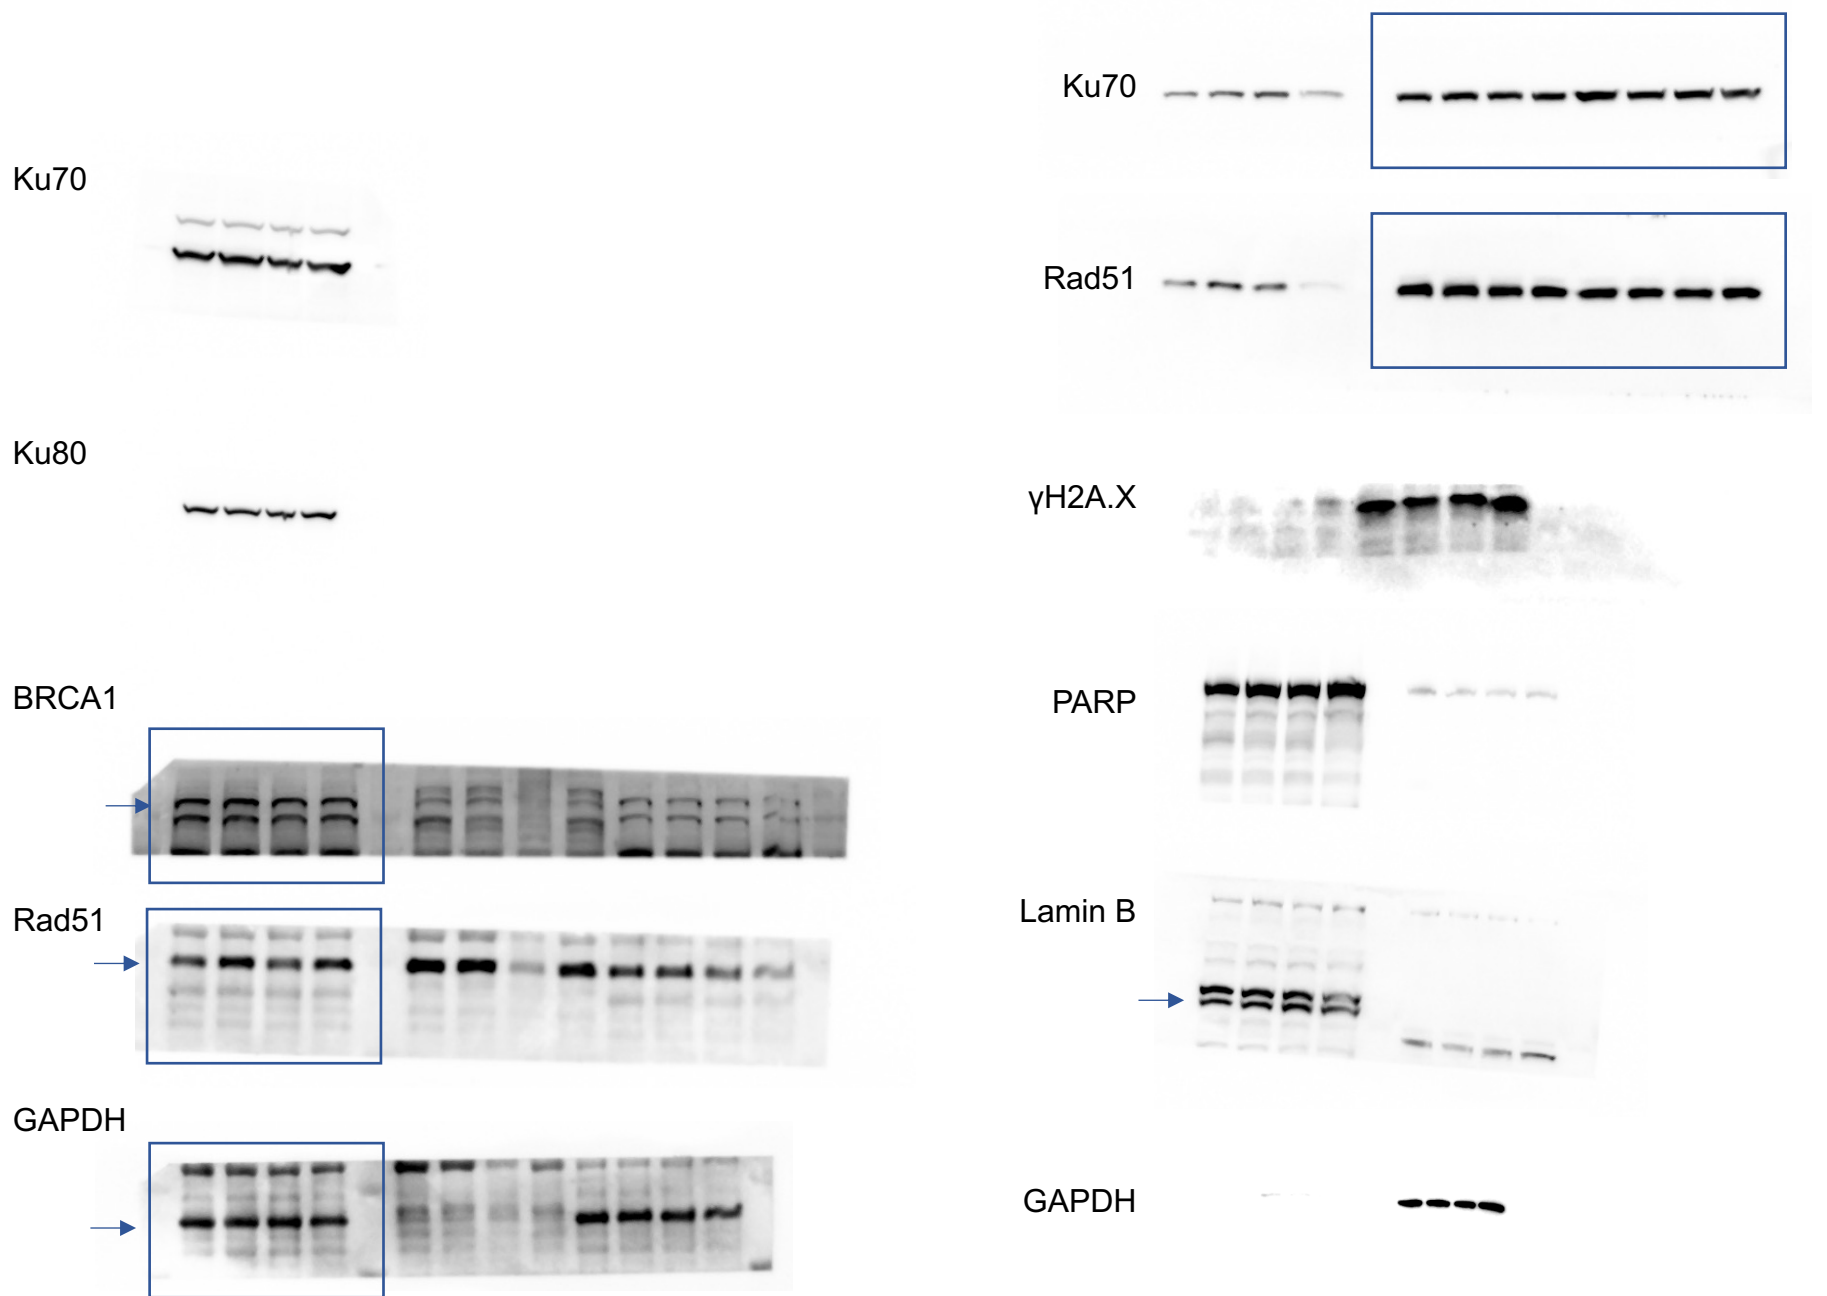

Supplement: 41419_2022_5182_MOESM4_ESM.pdf [file 41419_2022_5182_MOESM4_ESM.pdf]
